# Supplementary material
Source: publisher figshare collection journal article supplement (https://springernature.figshare.com/ndownloader/files/38912367)
Supplement: Supplementary file 1 [file 38912367]

## Sheet: Fig. S1
WR	flux (LMH)	osmotic pressure difference (bar)	Pli (um/s)	Pmg (um/s)
0	65.2603	2.52871	4.8038	0.0477
0.01	64.9668	2.54432	4.8123	0.0479
0.02	64.6671	2.56026	4.8198	0.0481
0.03	64.3631	2.57643	4.8274	0.0483
0.04	64.0546	2.59284	4.8351	0.0485
0.05	63.7415	2.60949	4.8429	0.0487
0.06	63.4238	2.62639	4.8508	0.0489
0.07	63.1012	2.64355	4.8588	0.0491
0.08	62.7738	2.66097	4.8668	0.0493
0.09	62.4413	2.67865	4.875	0.0495
0.1	62.1037	2.69661	4.8833	0.0497
0.11	61.7608	2.71485	4.8917	0.0499
0.12	61.4125	2.73338	4.9002	0.0502
0.13	61.0586	2.7522	4.9088	0.0504
0.14	60.699	2.77133	4.9175	0.0506
0.15	60.3336	2.79077	4.9263	0.0508
0.16	59.9621	2.81053	4.9353	0.0511
0.17	59.5845	2.83061	4.9443	0.0513
0.18	59.2006	2.85103	4.9535	0.0516
0.19	58.8101	2.8718	4.9628	0.0518
0.2	58.413	2.89293	4.9723	0.0521
0.21	58.009	2.91441	4.9819	0.0523
0.22	57.5979	2.93628	4.9916	0.0526
0.23	57.1796	2.95853	5.0015	0.0528
0.24	56.7538	2.98118	5.0115	0.0531
0.25	56.3202	3.00424	5.0216	0.0534
0.26	55.8788	3.02772	5.0319	0.0537
0.27	55.4292	3.05164	5.0424	0.0539
0.28	54.9713	3.07599	5.053	0.0542
0.29	54.5046	3.10082	5.0638	0.0545
0.3	54.0291	3.12611	5.0747	0.0548
0.31	53.5443	3.1519	5.0858	0.0551
0.32	53.0501	3.17819	5.0971	0.0555
0.33	52.546	3.205	5.1086	0.0558
0.34	52.0319	3.23235	5.1202	0.0561
0.35	51.5073	3.26025	5.1321	0.0564
0.36	50.9719	3.28873	5.1441	0.0568
0.37	50.4254	3.3178	5.1564	0.0571
0.38	49.8673	3.34748	5.1688	0.0575
0.39	49.2973	3.3778	5.1815	0.0579
0.4	48.715	3.40878	5.1944	0.0582
0.41	48.1199	3.44043	5.2075	0.0586
0.42	47.5116	3.47279	5.2209	0.059
0.43	46.8896	3.50587	5.2345	0.0594
0.44	46.2534	3.53971	5.2483	0.0598
0.45	45.6025	3.57434	5.2625	0.0602
0.46	44.9363	3.60977	5.2768	0.0607
0.47	44.2542	3.64605	5.2915	0.0611
0.48	43.5557	3.68321	5.3065	0.0616
0.49	42.8401	3.72127	5.3217	0.062
0.5	42.1067	3.76028	5.3373	0.0625
0.51	41.3548	3.80028	5.3531	0.063
0.52	40.5838	3.84129	5.3693	0.0635
0.53	39.7927	3.88337	5.3859	0.064
0.54	38.9808	3.92655	5.4028	0.0645
0.55	38.1473	3.97089	5.4201	0.0651
0.56	37.2912	4.01643	5.4378	0.0657
0.57	36.4116	4.06321	5.4559	0.0663
0.58	35.5076	4.1113	5.4744	0.0669
0.59	34.578	4.16074	5.4934	0.0675
0.6	33.6219	4.2116	5.5128	0.0681
0.61	32.6382	4.26393	5.5327	0.0688
0.62	31.6257	4.31778	5.5532	0.0695
0.63	30.5832	4.37323	5.5742	0.0702
0.64	29.5097	4.43034	5.5957	0.071
0.65	28.404	4.48915	5.618	0.0717
0.66	27.2631	4.54984	5.6404	0.0725
0.67	26.0897	4.61225	5.6641	0.0734
0.68	24.8809	4.67655	5.6885	0.0743
0.69	23.6361	4.74276	5.7138	0.0752
0.7	22.3548	4.81091	5.74	0.0762
0.71	21.0388	4.88091	5.7676	0.0772
0.72	19.6852	4.95291	5.7961	0.0783
0.73	18.2975	5.02673	5.8259	0.0794
0.74	16.8785	5.10221	5.8574	0.0806
0.75	15.4306	5.17922	5.8906	0.0819
0.76	13.9672	5.25706	5.9265	0.0833
0.77	12.4938	5.33544	5.9651	0.0848
0.78	11.0281	5.4134	6.0073	0.0864
0.79	9.5898	5.4899	6.054	0.0882
0.8	8.2146	5.56305	6.1067	0.0902

## Sheet: Fig. S2
NFX								NF90								NF270
solution	Li rejection	Mg rejection	Li (um/s)	Mg (um/s)	flux (LMH)	selectivity		solution	Li rejection	Mg rejection	Li (um/s)	Mg (um/s)	flux (LMH)	selectivity		solution	Li rejection	Mg rejection	Li (um/s)	Mg (um/s)	flux (LMH)	selectivity
2 g/L, 20:1	-84.0708	89.093	7.8028	0.1556	10.5634	16.8763		2 g/L, 20:1	28.7611	96.576	1.6582	0.0503	12.3944	20.8055		2 g/L, 20:1	-10.177	51.7007	71.0745	9.1557	76.0563	2.28113
2 g/L, 40:1	-72.8	73.6952	10.4811	0.4244	10.7042	6.56914		2 g/L, 40:1	3.2	94.9478	2.1748	0.069	11.9718	19.16		2 g/L, 40:1	-8	38.8309	127.192	18.8673	95.0704	1.7656
2 g/L, 60:1	-122.222	85.5439	8.7439	0.1929	10.7042	15.3722		2 g/L, 60:1	5.08274	94.8745	2.0664	0.0691	12.1127	18.5186		2 g/L, 60:1	-12.1749	46.8619	83.3317	11.0696	80.2817	2.11101
4 g/L, 20:1	-79.7441	86.2353	8.027	0.186	9.57746	13.0583		4 g/L, 20:1	15.565	96.1059	1.6167	0.0452	9.57746	21.6827		4 g/L, 20:1	-10.2345	51.8824	69.8117	8.8903	73.9437	2.29094
6 g/L, 20:1	-89.7507	86.3043	6.7805	0.1389	7.24346	13.8548		6 g/L, 20:1	4.70914	95.8043	1.1832	0.0308	6.03622	22.7118		6 g/L, 20:1	-15.374	49.8551	72.4631	8.0494	63.3803	2.30081

## Sheet: Fig. S3
2 g/L, 20:1			6 g/L, 20:1
flux (LMH)	interfacial MLR		flux (LMH)	interfacial MLR
112.452	32.8598		60.1492	32.1562
110.271	32.6066		58.5403	31.9184
108.069	32.3292		56.9205	31.6823
105.848	32.0575		55.286	31.4391
103.609	31.7916		53.6468	31.212
101.349	31.5025		51.991	30.9714
99.0752	31.2668		50.3276	30.7384
96.778	30.9912		48.657	30.5128
94.4667	30.7619		46.9708	30.2736
92.1322	30.4945		45.2784	30.0417
89.7838	30.2753		43.5771	29.809
87.4139	30.0342		41.8677	29.5756
85.0239	29.7823		40.1533	29.3468
82.6196	29.5746		38.4302	29.1116
80.1942	29.3456		36.699	28.8689
77.7484	29.102		34.968	28.6335
75.2825	28.8636		33.2298	28.3865
72.8031	28.655		31.494	28.1434
70.3055	28.4483		29.7547	27.8883
67.7901	28.2443		28.0219	27.6352
65.2608	28.0528		26.2895	27.3676
62.7104	27.8513		24.5673	27.0965
60.1429	27.658		22.8571	26.8182
57.5588	27.4602		21.1573	26.5225
54.9587	27.265		19.4784	26.2181
52.343	27.0719		17.8239	25.901
49.7126	26.8805		16.1952	25.5639
47.068	26.6906		14.6003	25.2079
44.4103	26.5008		13.0435	24.8299
41.7406	26.3116		11.5352	24.4319
39.0603	26.1213		10.0804	24.0112
36.3711	25.9287		8.6892	23.5694
33.6753	25.7335		7.3651	23.1056
30.9754	25.5327		6.1236	22.6287
28.2749	25.3252		4.9773	22.1478
25.5784	25.1066		3.943	21.6786
22.8916	24.8741
20.2211	24.6221
17.5793	24.3424
14.9782	24.0259
12.4353	23.6581
9.9749	23.2231
7.6281	22.7004
5.4362	22.0735
3.4599	21.346
1.8276	20.5941

## Sheet: Fig. S4
2 g/L, 20:1				6 g/L, 20:1
flux (LMH)	Rmg (%)	Cmg (mM)		flux (LMH)	Rmg (%)	Cmg (mM)
112.452	98.3095	59.6544		60.1492	97.1915	105.758
110.271	98.3387	58.3863		58.5403	97.1986	104.1
108.069	98.367	57.1324		56.9205	97.2037	102.456
105.848	98.3944	55.8949		55.286	97.2071	100.823
103.609	98.4207	54.6737		53.6468	97.2073	99.2107
101.349	98.4462	53.4673		51.991	97.2058	97.6078
99.0752	98.4702	52.2801		50.3276	97.2013	96.0228
96.778	98.4935	51.1071		48.657	97.1933	94.4563
94.4667	98.5154	49.9529		46.9708	97.183	92.9009
92.1322	98.5365	48.8133		45.2784	97.1687	91.3648
89.7838	98.556	47.6925		43.5771	97.1505	89.8458
87.4139	98.5746	46.5873		41.8677	97.128	88.3444
85.0239	98.5921	45.4982		40.1533	97.1002	86.8634
82.6196	98.608	44.4279		38.4302	97.0674	85.3996
80.1942	98.6228	43.3734		36.699	97.0291	83.9534
77.7484	98.6363	42.3351		34.968	96.983	82.5313
75.2825	98.6489	41.3132		33.2298	96.9302	81.1274
72.8031	98.6592	40.3101		31.494	96.8674	79.7487
70.3055	98.6678	39.324		29.7547	96.7956	78.3907
67.7901	98.6747	38.355		28.0219	96.7106	77.0602
65.2608	98.6792	37.4043		26.2895	96.6134	75.7527
62.7104	98.6822	36.4695		24.5673	96.4989	74.4745
60.1429	98.683	35.5517		22.8571	96.3646	73.2263
57.5588	98.6814	34.6511		21.1573	96.2091	72.0066
54.9587	98.677	33.7678		19.4784	96.0245	70.8215
52.343	98.6696	32.9017		17.8239	95.8047	69.6726
49.7126	98.6587	32.0529		16.1952	95.5442	68.5599
47.068	98.644	31.2215		14.6003	95.231	67.4875
44.4103	98.6247	30.4075		13.0435	94.8524	66.4574
41.7406	98.6002	29.611		11.5352	94.3853	65.4741
39.0603	98.5695	28.8323		10.0804	93.804	64.5399
36.3711	98.5314	28.0714		8.6892	93.065	63.6592
33.6753	98.4843	27.3287		7.3651	92.1212	62.833
30.9754	98.426	26.6045		6.1236	90.8782	62.0687
28.2749	98.3539	25.8993		4.9773	89.2108	61.3724
25.5784	98.2638	25.2137		3.943	86.9456	60.7526
22.8916	98.1503	24.5486
20.2211	98.0052	23.9049
17.5793	97.8161	23.2847
14.9782	97.5633	22.6898
12.4353	97.214	22.123
9.9749	96.7089	21.5882
7.6281	95.9315	21.0904
5.4362	94.6216	20.6361
3.4599	92.0946	20.2355
1.8276	86.2695	19.9119

## Sheet: Fig. S5
1 bar			2 bar			4 bar			6 bar			8 bar
LiR	Purity		LiR	Purity		LiR	Purity		LiR	Purity		LiR	Purity
0	0.461307		0	0.719711		0	0.727419		0	0.703012		0	0.673101
0.01	0.45443		0.01	0.717701		0.01	0.726312		0.01	0.702245		0.01	0.672322
0.02	0.44772		0.02	0.715646		0.02	0.725232		0.02	0.701366		0.02	0.671451
0.03	0.440633		0.03	0.713542		0.03	0.724147		0.03	0.70045		0.03	0.670549
0.04	0.433601		0.04	0.711385		0.04	0.723047		0.04	0.699512		0.04	0.669627
0.05	0.426428		0.05	0.709173		0.05	0.721931		0.05	0.698553		0.05	0.668688
0.06	0.419164		0.06	0.706904		0.06	0.720797		0.06	0.697578		0.06	0.667735
0.07	0.411808		0.07	0.704575		0.07	0.719644		0.07	0.696587		0.07	0.666767
0.08	0.404374		0.08	0.702182		0.08	0.718471		0.08	0.69558		0.08	0.665786
0.09	0.396811		0.09	0.699724		0.09	0.717277		0.09	0.694556		0.09	0.66479
0.1	0.389222		0.1	0.697196		0.1	0.716062		0.1	0.693516		0.1	0.66378
			0.11	0.694596		0.11	0.714825		0.11	0.692459		0.11	0.662756
			0.12	0.69192		0.12	0.713565		0.12	0.691385		0.12	0.661717
			0.13	0.689165		0.13	0.71228		0.13	0.690293		0.13	0.660663
			0.14	0.686326		0.14	0.710971		0.14	0.689184		0.14	0.659594
			0.15	0.683399		0.15	0.709637		0.15	0.688056		0.15	0.658508
			0.16	0.680379		0.16	0.708275		0.16	0.68691		0.16	0.657406
			0.17	0.677261		0.17	0.706887		0.17	0.685743		0.17	0.656288
			0.18	0.67404		0.18	0.705469		0.18	0.684557		0.18	0.655153
			0.19	0.67071		0.19	0.704022		0.19	0.68335		0.19	0.654001
			0.2	0.667264		0.2	0.702545		0.2	0.682121		0.2	0.65283
			0.21	0.663694		0.21	0.701036		0.21	0.680871		0.21	0.651641
			0.22	0.659993		0.22	0.699493		0.22	0.679598		0.22	0.650432
			0.23	0.656154		0.23	0.697916		0.23	0.678301		0.23	0.649204
			0.24	0.652168		0.24	0.696302		0.24	0.67698		0.24	0.647956
			0.25	0.648027		0.25	0.694652		0.25	0.675634		0.25	0.646686
			0.26	0.643726		0.26	0.692963		0.26	0.674261		0.26	0.645395
			0.27	0.639249		0.27	0.691233		0.27	0.672862		0.27	0.644082
			0.28	0.634583		0.28	0.68946		0.28	0.671435		0.28	0.642746
			0.29	0.629715		0.29	0.687643		0.29	0.669979		0.29	0.641386
			0.3	0.624632		0.3	0.68578		0.3	0.668493		0.3	0.640001
			0.31	0.619317		0.31	0.683868		0.31	0.666976		0.31	0.638591
			0.32	0.613753		0.32	0.681906		0.32	0.665426		0.32	0.637155
			0.33	0.607923		0.33	0.67989		0.33	0.663842		0.33	0.635691
			0.34	0.601807		0.34	0.677818		0.34	0.662224		0.34	0.634199
			0.35	0.595383		0.35	0.675687		0.35	0.660569		0.35	0.632678
			0.36	0.588629		0.36	0.673499		0.36	0.658875		0.36	0.631127
			0.37	0.581297		0.37	0.671246		0.37	0.657143		0.37	0.629544
			0.38	0.57382		0.38	0.668922		0.38	0.655368		0.38	0.627928
			0.39	0.565944		0.39	0.666526		0.39	0.65355		0.39	0.626279
			0.4	0.557628		0.4	0.664052		0.4	0.651687		0.4	0.624593
			0.41	0.548837		0.41	0.661497		0.41	0.649777		0.41	0.622871
			0.42	0.539581		0.42	0.658855		0.42	0.647816		0.42	0.62111
			0.43	0.529797		0.43	0.656121		0.43	0.645803		0.43	0.619309
			0.44	0.519506		0.44	0.653288		0.44	0.643735		0.44	0.617465
			0.45	0.508672		0.45	0.650351		0.45	0.64161		0.45	0.615578
			0.46	0.497278		0.46	0.647304		0.46	0.639423		0.46	0.613645
			0.47	0.485374		0.47	0.644136		0.47	0.637172		0.47	0.611663
			0.48	0.47296		0.48	0.64084		0.48	0.634854		0.48	0.60963
			0.49	0.460077		0.49	0.637407		0.49	0.632464		0.49	0.607545
						0.5	0.633824		0.5	0.629998		0.5	0.605404
						0.51	0.630082		0.51	0.627451		0.51	0.603205
						0.52	0.626166		0.52	0.624818		0.52	0.600943
						0.53	0.622061		0.53	0.622094		0.53	0.598614
						0.54	0.617751		0.54	0.619272		0.54	0.596217
						0.55	0.613216		0.55	0.616347		0.55	0.593747
						0.56	0.608435		0.56	0.613309		0.56	0.591199
						0.57	0.603382		0.57	0.610152		0.57	0.588568
						0.58	0.598029		0.58	0.606864		0.58	0.585848
						0.59	0.592336		0.59	0.603437		0.59	0.583032
						0.6	0.58627		0.6	0.599859		0.6	0.580114
						0.61	0.579785		0.61	0.596115		0.61	0.577089
						0.62	0.572829		0.62	0.592192		0.62	0.573949
						0.63	0.565354		0.63	0.588072		0.63	0.570682
						0.64	0.557277		0.64	0.583736		0.64	0.567279
						0.65	0.548514		0.65	0.57916		0.65	0.56373
						0.66	0.538953		0.66	0.574319		0.66	0.560021
						0.67	0.528495		0.67	0.569181		0.67	0.556136
						0.68	0.516991		0.68	0.56371		0.68	0.552058
						0.69	0.504301		0.69	0.557865		0.69	0.547767
						0.7	0.490273		0.7	0.551594		0.7	0.543241
						0.71	0.474755		0.71	0.544831		0.71	0.538452
						0.72	0.457646		0.72	0.537502		0.72	0.533368
									0.73	0.529513		0.73	0.527949
									0.74	0.520746		0.74	0.522151
									0.75	0.511059		0.75	0.515917
									0.76	0.500259		0.76	0.509175
									0.77	0.488115		0.77	0.501839
									0.78	0.474337		0.78	0.493799
									0.79	0.458576		0.79	0.484908
									0.8	0.440425		0.8	0.474979
												0.81	0.463765
												0.82	0.450924
												0.83	0.435999

## Sheet: Fig. S6
2 g/L, 20:1
flux (LMH)	Rli (%)	Rmg (%)	Pli (um/s)	Pmg (um/s)
112.452	39.9606	98.3095	5.661	0.0646
110.271	40.0373	98.3387	5.6157	0.0637
108.069	40.1735	98.367	5.5694	0.0627
105.848	40.289	98.3944	5.5236	0.0618
103.609	40.382	98.4207	5.4782	0.0609
101.349	40.5368	98.4462	5.4318	0.06
99.0752	40.5205	98.4702	5.3881	0.0591
96.778	40.6193	98.4935	5.3427	0.0582
94.4667	40.5551	98.5154	5.2997	0.0573
92.1322	40.6032	98.5365	5.255	0.0565
89.7838	40.4677	98.556	5.2129	0.0556
87.4139	40.3893	98.5746	5.17	0.0548
85.0239	40.3324	98.5921	5.1266	0.0539
82.6196	40.0782	98.608	5.0858	0.0531
80.1942	39.8773	98.6228	5.0442	0.0523
77.7484	39.7062	98.6363	5.0019	0.0515
75.2825	39.4793	98.6489	4.9598	0.0507
72.8031	39.0819	98.6592	4.92	0.05
70.3055	38.6221	98.6678	4.8806	0.0492
67.7901	38.0919	98.6747	4.8417	0.0485
65.2608	37.4302	98.6792	4.8042	0.0477
62.7104	36.7393	98.6822	4.7661	0.047
60.1429	35.9173	98.683	4.7288	0.0463
57.5588	35.0148	98.6814	4.6916	0.0456
54.9587	33.9799	98.677	4.6551	0.0449
52.343	32.7941	98.6696	4.6191	0.0443
49.7126	31.4358	98.6587	4.5838	0.0436
47.068	29.8786	98.644	4.549	0.043
44.4103	28.091	98.6247	4.5149	0.0423
41.7406	26.0341	98.6002	4.4814	0.0417
39.0603	23.6606	98.5695	4.4487	0.0411
36.3711	20.9114	98.5314	4.4167	0.0405
33.6753	17.7127	98.4843	4.3854	0.0399
30.9754	13.9716	98.426	4.355	0.0394
28.2749	9.5696	98.3539	4.3255	0.0388
25.5784	4.3548	98.2638	4.297	0.0383
22.8916	-1.8688	98.1503	4.2697	0.0378
20.2211	-9.3594	98.0052	4.2436	0.0373
17.5793	-18.4324	97.8161	4.2192	0.0368
14.9782	-29.5029	97.5633	4.1968	0.0364
12.4353	-43.0742	97.214	4.1766	0.0359
9.9749	-59.6665	96.7089	4.1595	0.0356
7.6281	-79.6303	95.9315	4.1463	0.0352
5.4362	-102.527	94.6216	4.1379	0.0349
3.4599	-125.143	92.0946	4.1351	0.0347
1.8276	-135.539	86.2695	4.1376	0.0345
